# Supplementary material for: Near-atomic structures of the BBSome reveal the basis for BBSome activation and binding to GPCR cargoes
Source: eLife. 2020 Jun 8;9:e55954. doi: 10.7554/eLife.55954 (PMC7311171; doi:10.7554/eLife.55954)
Supplement: Supplementary file 1. [file elife-55954-supp1.xlsx]

## Sheet: Sheet1
Data collection and processing
	Apo-BBSome	BBSome-ARL6 complex
		Dataset1	Dataset2
Microscope	Titan Krios (FEI)	Titan Krios (FEI)	Titan Krios (FEI)
Voltage (kV)	300	300	300
Detector	K2 Summit (Gatan)	K2 Summit (Gatan)	K3 (Gatan)
Pixel size (Å)	1.3	1	1.08
Magnification	22500	28000	64000
Defocus range (µm)	1.5 to 3.0	1.5 to 2.5	1.5 to 2.5
Total dose (electrons/Å2)	80	75.2	51.4
Particles for final reconstruction (no.)	560777	209646
Symmetry imposed	C1	C1
Map resolution at 0.143 FSC threshold (Å)	3.4	4
Model refinement
Map sharpening B factor (Å2)	-108	-120
No. protein residues	3831	3958
No. atoms: protein	27486	26824
B factors	56.11	50.36
R.m.s. deviations
Bond lengths (Å)	0.005	0.005
Bond angles (°)	1.118	1.114
Validation
Molprobity score	2.36	2.32
Clashscore	13.29	13.72
Poor rotamers (%)	2.05	1.57
Ramachandran plot (%)
Favored/Allowed/Outliers	91.74/8.12/0.13	90.72/8.77/0.51
